# Supplementary material
Source: publisher figshare collection journal article supplement (https://tandf.figshare.com/ndownloader/files/17992412)
Supplement: Supplementary file 1 [file 17992412]

**Synthesis, Characterization and Biological evaluation of indole aldehydes containing N-benzyl moiety**

Dattatray N. Survase1, Shrikrishna S. Karhale1, Vijay M. Khedkar3, Vasant B. Helavi1 , 2*

1Medicinal Chemistry Research Laboratory, Department of Chemistry, Rajaram College, Shivaji University, Kolhapur (MS), India.

2Department of Chemistry, Government Vidarbha Institute of Science, Amravati (MS), India.

3Department of Pharmaceutical Chemistry, Shri Vile Parle Kelavani Mandal's Institute of Pharmacy,  Mumbai - Agra National Hwy, Dhule, Maharashtra 424001, India.

**Spectral data of compounds**

**1-benzyl-1H-indole-3-carbaldehyde [1] (4a)**

M.p.(120-123oc),Yield: 90 %; M.F: C16H13NO; IR (KBr, cm-1): 2922, 1633, 1522, 1444, 1392, 1173, 731; 1H NMR (400 MHz, CDCl3: δ = 5.38 (2H, s, -CH2-), 7.20-7.22 (2H, m, Aromatic-CH), 7.28-7.39 (6H, m, Aromatic-CH), 7.74 (1H, s, Aromatic-CH), 8.34-8.36 (1H, m, Aromatic-CH) 10.02 (1H, s, CHO), Anal. calcd.: C, 81.68; H, 5.57; N, 5.95. Found: C, 81.66; H, 5.56; N, 5.90%. ESI m/z = 235.10 (M+H).

**1-(4-bromobenzyl)-1H-indole-3-carbaldehyde [1] (4b)**

M.p.(125-127oc),Yield: 88 %; M.F: C16H12BrNO; IR (KBr, cm-1): 3053, 1653, 1530, 1466, 1387, 1169, 745; 1H NMR (400 MHz, CDCl3: δ = 5.34 (2H, s, -CH2), 7.05-7.30 (2H, m, Aromatic-CH), 7.32-7.36 (3H, m, Aromatic-CH), 7.48-7.50 (2H, d, Aromatic-CH, J=8Hz), 7.73 (1H, s, Aromatic-CH), 8.34-8.36 (1H, m, Aromatic-CH) 10.03 (1H, s, CHO), Anal. calcd.: C, 61.17; H, 3.85; Br, 25.43; N, 4.46; Found: C, 61.14; H, 3.84; Br, 25.41; N, 4.43 %. ESI m/z = 313.01(M+H).

**5-bromo-1-(4-fluorobenzyl)-1H-indole-3-carbaldehyde (4c)**

M.p.(107-109oc),Yield: 86 %; M.F: C16H11BrFNO; IR (KBr, cm-1): 2918, 1645, 1528, 1448, 1034, 775, 739; 1H NMR (400 MHz, CDCl3: δ = 5.34 (2H, s, -CH2), 7.05-7.10 (2H, m, Aromatic-CH), 7.15-7.20 (3H, Aromatic-CH), 7.40-7.43 (1H, d, Aromatic-CH), 7.72 (1H, s, Aromatic-CH), 8.51-8.52 (1H, d, Aromatic-CH) 9.99 (1H, s, CHO).13C NMR (CDCl3): 50.49, 111.70, 116.18, 116.39, 116.87, 118.0, 124.98, 127.05, 127.33, 128.91, 128.99, 130.67, 135.95, 138.61, 161.48-163.94, 184.28, Anal. calcd.: C, 57.85; H, 3.34; Br, 24.06; F, 5.72; N, 4.22; Found: C, 57.81; H, 3.31; Br, 24.04; F, 5.69; N, 4.20 %. ESI m/z = 331.0 (M+H).

**1-(2-bromobenzyl)-1H-indole-3-carbaldehyde [3] (4d)**

M.p.(127-129oc),Yield: 89 %; M.F: IR (KBr, cm-1): 2925, 1651, 1526, 1393, 1044, 1013, 786, 740; C16H12BrNO; 1H NMR (400 MHz, CDCl3: δ = 5.45 (2H, s, -CH2), 6.78-6.81 (1H, m, Aromatic-CH), 7.22-7.25 (2H, m, Aromatic-CH), 7.33-7.38 (3H, m, Aromatic-CH), 7.66-7.68 (1H, m, Aromatic-CH), 7.73 (1H, s, Aromatic-CH), 8.36-8.38 (1H, m, Aromatic-CH) 10.03 (1H, s, CHO).13C NMR (CDCl3): 50.94, 110.33, 118.77, 122.25, 122.92, 123.24, 124.37, 125.41, 128.14, 128.68, 129.96, 133.26, 134.63, 137.43, 138.56, 184.70, Anal. calcd.: C, 61.17; H, 3.85; Br, 25.43; N, 4.46; Found: C, 61.13; H, 3.81; Br, 25.42; N, 4.42 %. ESI m/z = 313.01(M+H).

**1-(4-fluorobenzyl)-1H-indole-3-carbaldehyde [2] (4e)**

M.p.(121-123oc),Yield: 85 %; M.F: C16H12FNO; IR (KBr, cm-1): 2764, 1652, 1531, 1466, 1390, 1220, 746; 1H NMR (400 MHz, CDCl3: δ = 5.36 (2H, s, -CH2), 7.04-7.09 (2H, m, Aromatic-CH), 7.17-7.20 (2H, Aromatic-CH), 7.32-7.36 (3H, m, Aromatic-CH), 7.73 (1H, s, Aromatic-CH), 8.34-8.37 (1H, m, Aromatic-CH) 10.03 (1H, s, CHO).13C NMR (CDCl3): 50.27, 110.26, 116.05, 116.27, 118.64, 122.25, 124.27, 125.56, 128.95, 129.03, 131.08, 131.12, 137.33, 138.19, 161.39, 163.85, 184.60, Anal. calcd.: C, 75.88; H, 4.78; F, 7.50; N, 5.53; Found: C, 75.85; H, 4.76; F, 7.48; N, 5.51 %. ESI m/z = 253.09(M+H).

**1-(3,4-dichlorobenzyl)-1H-indole-3-carbaldehyde (4f)**

M.p.(118-119oc),Yield: 87 %; M.F: C16H11Cl2NO; IR (KBr, cm-1): 2933, 1660, 1532, 1464, 1385, 1172, 742; 1H NMR (400 MHz, CDCl3: δ = 5.34 (2H, s, -CH2), 6.97-6.99 (1H, m, Aromatic-CH), 7.27-7.36 (4H, Aromatic-CH), 7.37-7.43 (1H, d, Aromatic-CH), 7.73 (1H, s, Aromatic-CH), 8.34-8.36 (1H, m, Aromatic-CH) 10.03 (1H, s, CHO); 13C NMR (CDCl3): 49.83, 110.15, 118.89, 122.23, 123.33, 124.49, 125.52, 126.25, 128.96, 131.15, 132.67, 133.40, 135.67, 137.17, 138.16, 184.64, Anal. calcd.: C, 63.18; H, 3.65; Cl, 23.31; N, 4.60, Found: C, 63.13; H, 3.61; Cl, 23.28; N, 4.58 %. ESI m/z = 303.02 (M+H).

**1-(2,6-difluorobenzyl)-1H-indole-3-carbaldehyde (4g)**

M.p.(117-119oc),Yield: 81 %; M.F: C16H11F2NO; IR (KBr, cm-1): 1652, 1528, 1466, 1386, 1161, 740; 1H NMR (400 MHz, CDCl3: δ = 5.59 (2H, s, -CH2), 7.34-7.39 (3H, m, Aromatic-CH), 7.41-7.49 (3H, Aromatic-CH), 7.58-7.60 (1H, d, Aromatic-CH, J=8Hz), 8.34-8.36 (1H, m, Aromatic-CH) 9.95 (1H, s, CHO), 13C NMR (CDCl3): 45.54, 110.17, 111.80, 111.86, 112.05, 118.49, 122.07, 123.12, 124.16, 125.30, 129.05, 130.37, 131.09, 136.98, 137.19-137.59(Jc-f = 160Hz), 184.71, m/z = 271.08., Anal. calcd.: C, 70.84; H, 4.09; F, 14.01; N, 5.16; Found: C, 70.82; H, 4.06; F, 14.00; N, 5.13 %.

**1-(4-bromobenzyl)-5-methoxy-1H-indole-3-carbaldehyde (4h)**

M.p.(107-109oc),Yield: 89 %; M.F: C17H14BrNO2; IR (KBr, cm-1): 2924, 1643, 1526, 1472, 1386, 1167, 786; 1H NMR (400 MHz, CDCl3: δ = 3.90 (3H, s, -OCH3), 5.29 (2H, s, -CH2), 6.92-6.95 (1H, m, Aromatic-CH), 7.03-7.05 (2H, m,Aromatic-CH), 7.14-7.17(1H, d, Aromatic-CH), 7.47-7.50 (2H, m, Aromatic-CH), 7.67 (1H, s, Aromatic-CH) 7.82-7.83 (1H, m, Aromatic-CH), 9.98 (1H, s, CHO); 13C NMR (CDCl3): 50.57, 55.84, 103.47, 111.14, 114.83, 118.44, 122.41, 126.31, 128.71, 132.13, 132.29, 134.42, 138.43, 156.42, 184.60, Anal. calcd.: C, 59.32; H, 4.10; Br, 23.21; N, 4.07; Found: C, 59.31; H, 4.10; Br, 23.18; N, 4.05 % ESI m/z = 343.02 (M+H).

**Spectral data of compounds**

**Fig 2.2:** IR of 1-benzyl-1H-indole-3-carbaldehyde (4a)

**Fig 2.3:** 1HNMR of 1-benzyl-1H-indole-3-carbaldehyde (4a)

**Fig 2.4:** IR of 1-(4-bromobenzyl)-1H-indole-3-carbaldehyde (4b)

**Fig 2.5:** 1HNMR of 1-(4-bromobenzyl)-1H-indole-3-carbaldehyde (4b)

**Fig 2.6:** IR of 5-bromo-1-(4-fluorobenzyl)-1H-indole-3-carbaldehyde (4c)

**Fig 2.7:** 1HNMR of 5-bromo-1-(4-fluorobenzyl)-1H-indole-3-carbaldehyde(4c)

**
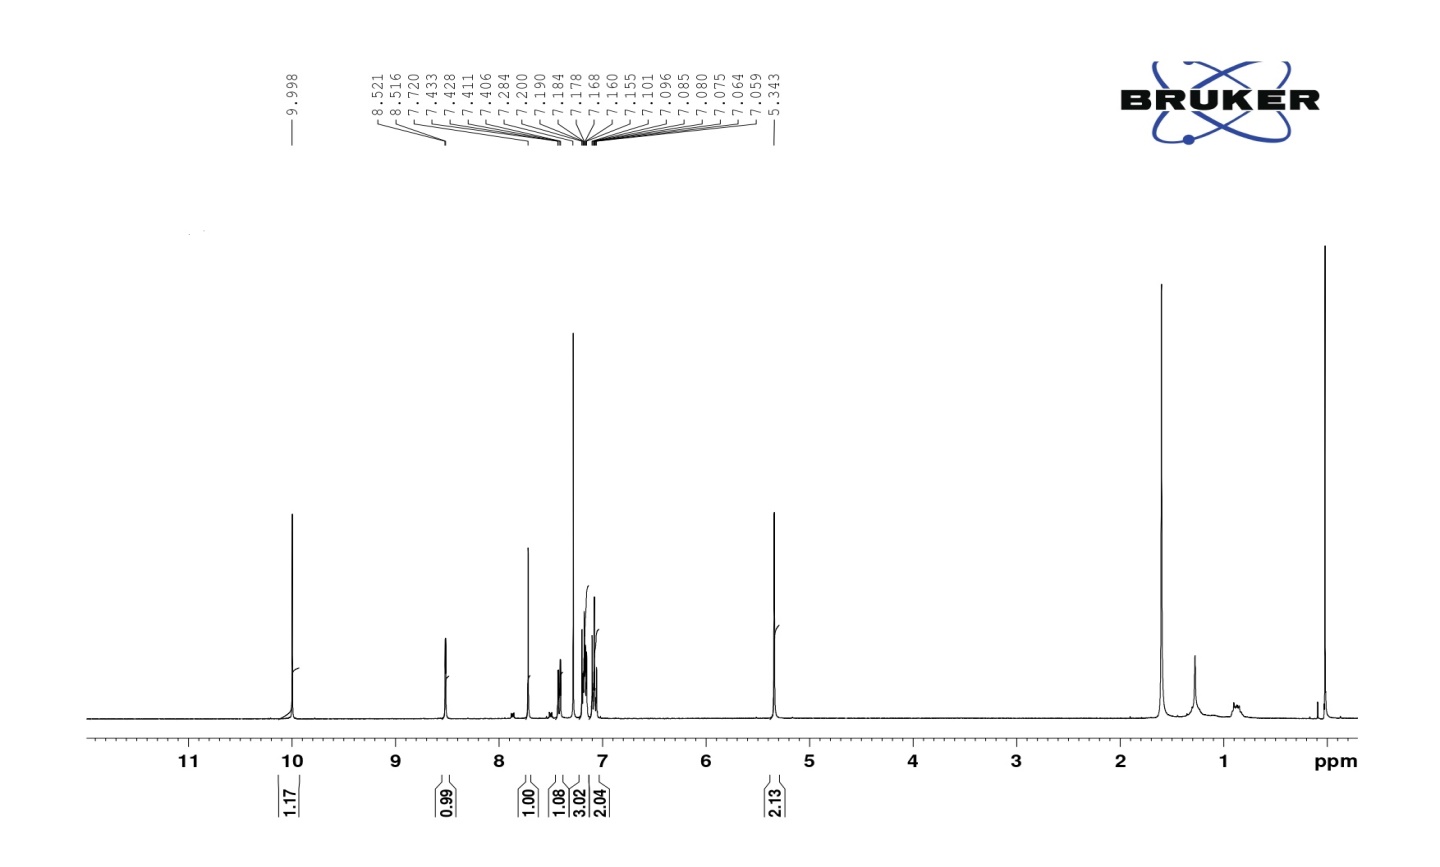
**

**Fig 2.8:** 13CNMR of 5-bromo-1-(4-fluorobenzyl)-1H-indole-3-carbaldehyde (4c)

**Fig 2.9:** IR of 1-(2-bromobenzyl)-1H-indole-3-carbaldehyde (4d)

**Fig 2.10:** 1HNMR of 1-(2-bromobenzyl)-1H-indole-3-carbaldehyde (4d)

**Fig 2.11:**13CNMR of 1-(2-bromobenzyl)-1H-indole-3-carbaldehyde (4d)

**Fig 2.12:** IR of 1-(4-fluorobenzyl)-1H-indole-3-carbaldehyde (4e)

**Fig 2.13:** 1HNMR of 1-(4-fluorobenzyl)-1H-indole-3-carbaldehyde (4e)

**Fig 2.14:** 13CNMR of 1-(4-fluorobenzyl)-1H-indole-3-carbaldehyde (4e)

**Fig 2.15:** IR of 1-(3,4-dichlorobenzyl)-1H-indole-3-carbaldehyde (4f)

**Fig 2.16:** 1HNMR of 1-(3,4-dichlorobenzyl)-1H-indole-3-carbaldehyde (4f)

**Fig 2.17:** 13CNMR of 1-(3,4-dichlorobenzyl)-1H-indole-3-carbaldehyde (4f)

**Fig 2.18:** IR of 1-(2,6-difluorobenzyl)-1H-indole-3-carbaldehyde (4g)

**Fig 2.19:** 1HNMR of 1-(2,6-difluorobenzyl)-1H-indole-3-carbaldehyde (4g)

**Fig 2.20:** 13CNMR of 1-(2,6-difluorobenzyl)-1H-indole-3-carbaldehyde (4g)

**
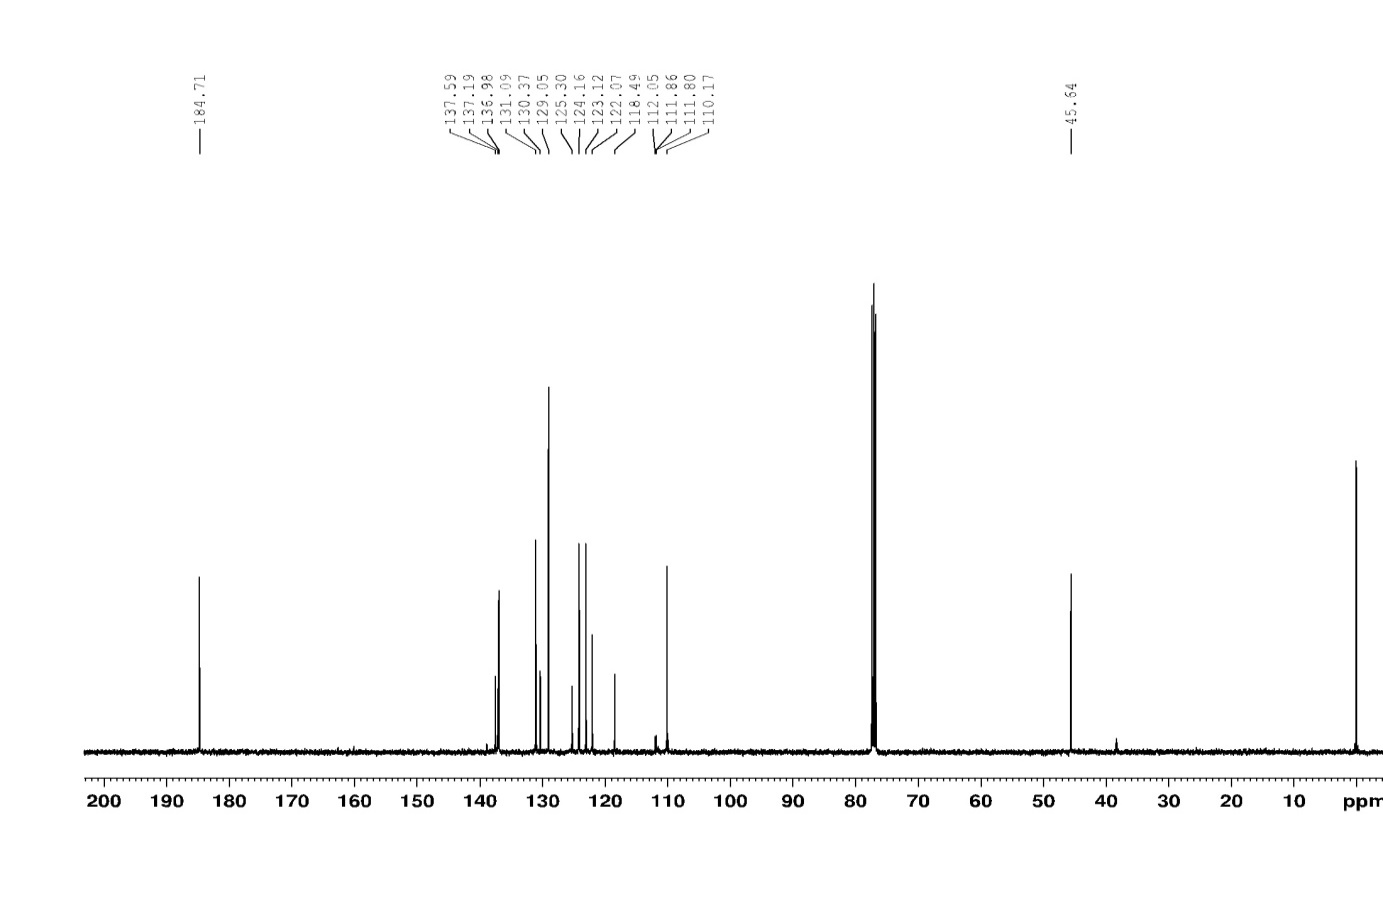
**

**Fig 2.21:** IR of 1-(4-bromobenzyl)-5-methoxy-1H-indole-3-carbaldehyde (4h)

**Fig 2.22:** 1HNMR of 1-(4-bromobenzyl)-5-methoxy-1H-indole-3-carbaldehyde (4h)

**Fig 2.23:** 13CNMR of 1-(4-bromobenzyl)-5-methoxy-1H-indole-3-carbaldehyde (4h)

**Molecular Docking**

The Glide (Grid-Based Ligand Docking with Energetics) Module incorporated in the Schrödinger molecular modeling software (Schrödinger, Inc., USA, 2016) was used to gain an insight into the binding mode of the indole aldehydes (1-10) in the active site of cyclooxygenase-2 enzyme.[24-28] With this purpose, the X-ray crystal structure of cyclooxygenase-2 (COX-2) enzyme bound with its inhibitor Diclofenac was retrieved from the Protein Data Bank ([www.rcsb.org](http://www.rcsb.org)) and was refined using the *Protein Preparation Wizard* to be used for Glide docking. The co-crystallized water molecules were removed (since none of them were found to be conserved in the ligand interaction), the hydrogen atoms were added and all atom force field (OPSL-2005) charges and atom types were assigned. Furthermore, energy minimization of the obtained enzyme structure was performed until the average root mean square deviation of non-hydrogen atoms reached 0.3 Å in order to relieve the steric clashes among the residues due to addition of hydrogen atoms. On the other hand, the three-dimensional structure of all the molecules under investigation were sketched using the *build* panel in Maestro and refined using *LigPrep* module which involved addition of hydrogen’s, adjusting realistic bond lengths and bond angles, correction of chiralities and ionization states, generation of tautomers, and ring conformations. Following the assignment of partial charges to the structure using the OPLS-2005 force-field, each of them was subjected to energy minimization setting a RMSD cutoff of 0.001Å. The resulting structures were then used as input for the molecular docking study. After ensuring that the enzyme and ligands were in the correct form, grid was prepared to define the active site of the enzyme with the size of the bounding box set on 30 Å using the *Receptor Grid Generation* panel in Glide. This tool generates two cubical boxes having a common centroid to organize the calculations: a larger enclosing and a smaller binding box. With the non-covalently bound native ligand-Diclofenac in place, the active site was defined by a box that has dimensions of 14x14x14Å centered on the centroid of Diclofenac in the crystal complex which was large enough to allow ligands to explore a large portion of the enzyme. All molecules under study (1-10) were docked into the binding site of COX-2. The Glide algorithm is based on a funnel type approach performing a systematic search of positions, orientations, and conformations of the ligand in the receptor binding site. The search begins with a random positioning and scoring phase that significantly limits the search space and reduces the number of poses to be selected for minimization on the precomputed OPLS-2005 van der Waals and electrostatic grids for the protein. The 5–10 lowest-energy poses obtained from this stage are subjected to Monte Carlo simulations in which the receptor–ligand complex undergo a full molecular mechanics energy minimization (OPLS–AA force field) in order to optimise flexible side-chain residues of COX-2 that may interact with the ligands. Finally the minimized poses accepted are then rescored using the Glide Score function, which is a more sophisticated version of ChemScore This force field includes additional terms accounting for solvation and repulsive interactions. In order to provide a better correlation between good poses and good scores, Glide Extra-Precision (XP) Mode was used to analyze the binding poses of the ligands. The output file in terms of the docking poses of the ligands was analyzed for the key elements of interaction with the enzyme using the Maestro’s Pose Viewer utility. The molecular docking protocol utilized in the current study was validated by extracting the native ligand *diclofenac* from the binding site and re-docking it to the binding site of COX-2. The root mean square deviation (RMSD) between the original conformation of *diclofenac* and the conformation obtained from its re-docking into COX-2 structure was found to be less than 1Å, validating the reliability of and reproducibility of the docking procedure (**Figure 11S**).

**Figures**


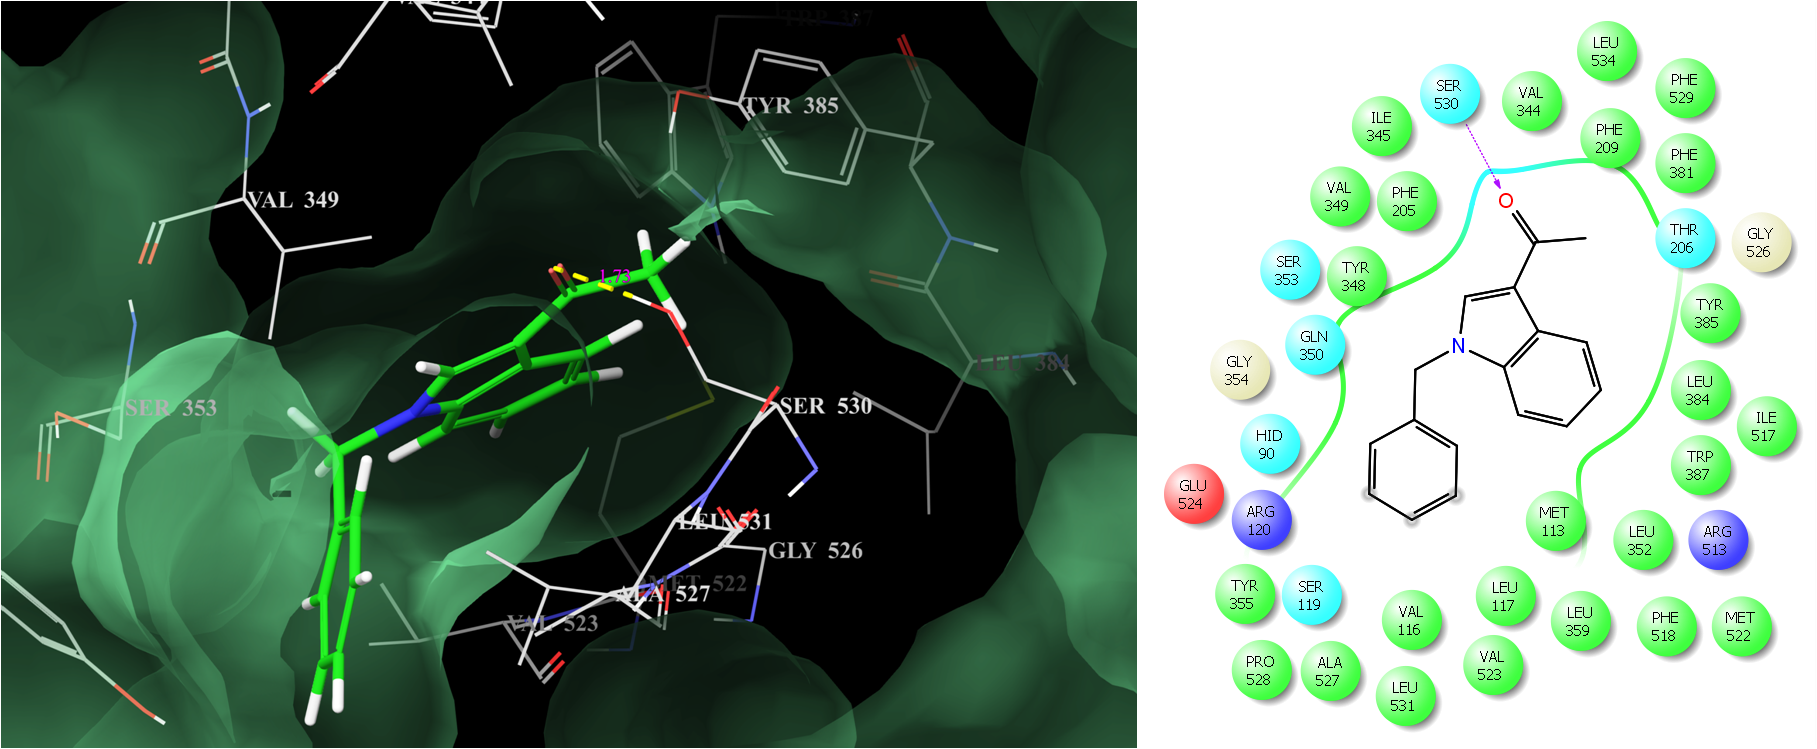


**Figure 1S.** Binding mode of **4a** into the active site cyclo-oxygenase-2 ( hydrogen bonding interaction is represented by pink dotted arrow)


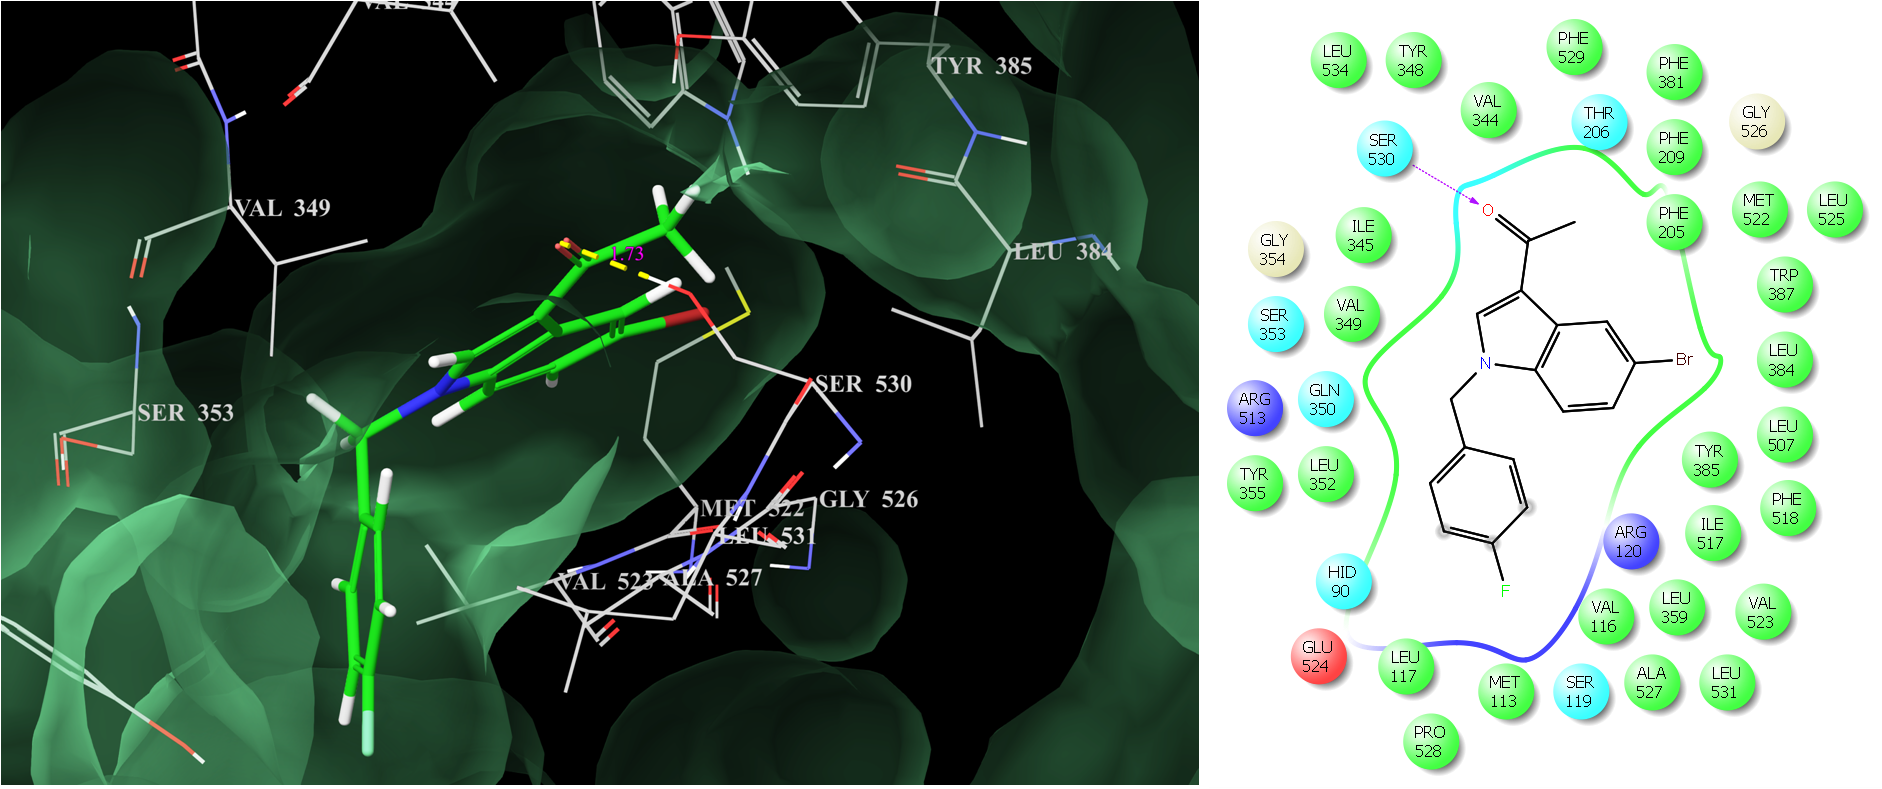


**Figure 2S.** Binding mode of **4c** into the active site cyclo-oxygenase-2 ( hydrogen bonding interaction is represented by pink dotted arrow)


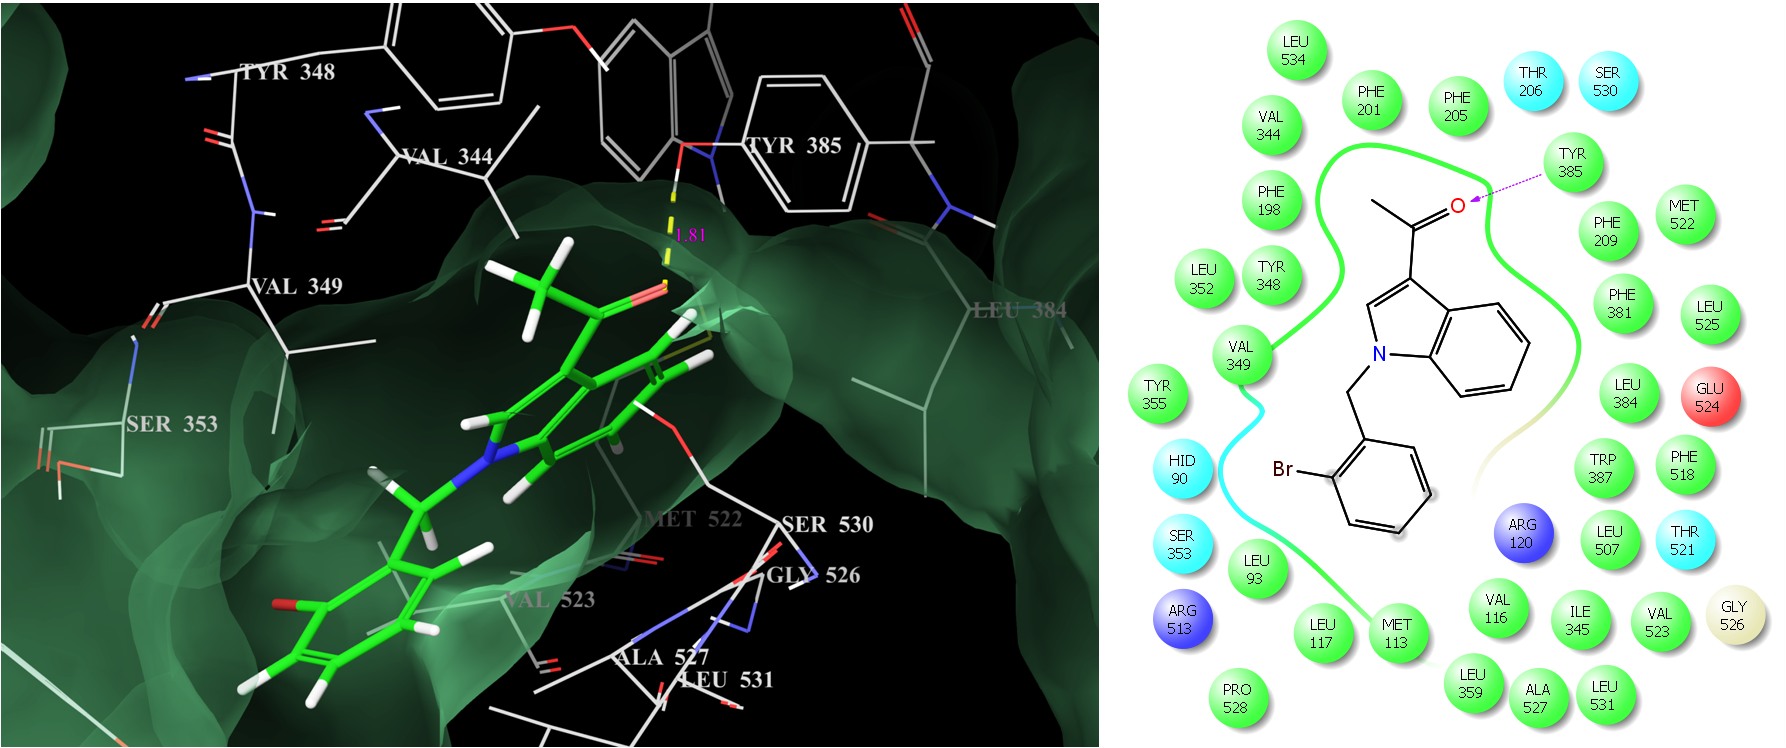


**Figure 3S.** Binding mode of **4d** into the active site cyclo-oxygenase-2 ( hydrogen bonding interaction is represented by pink dotted arrow)


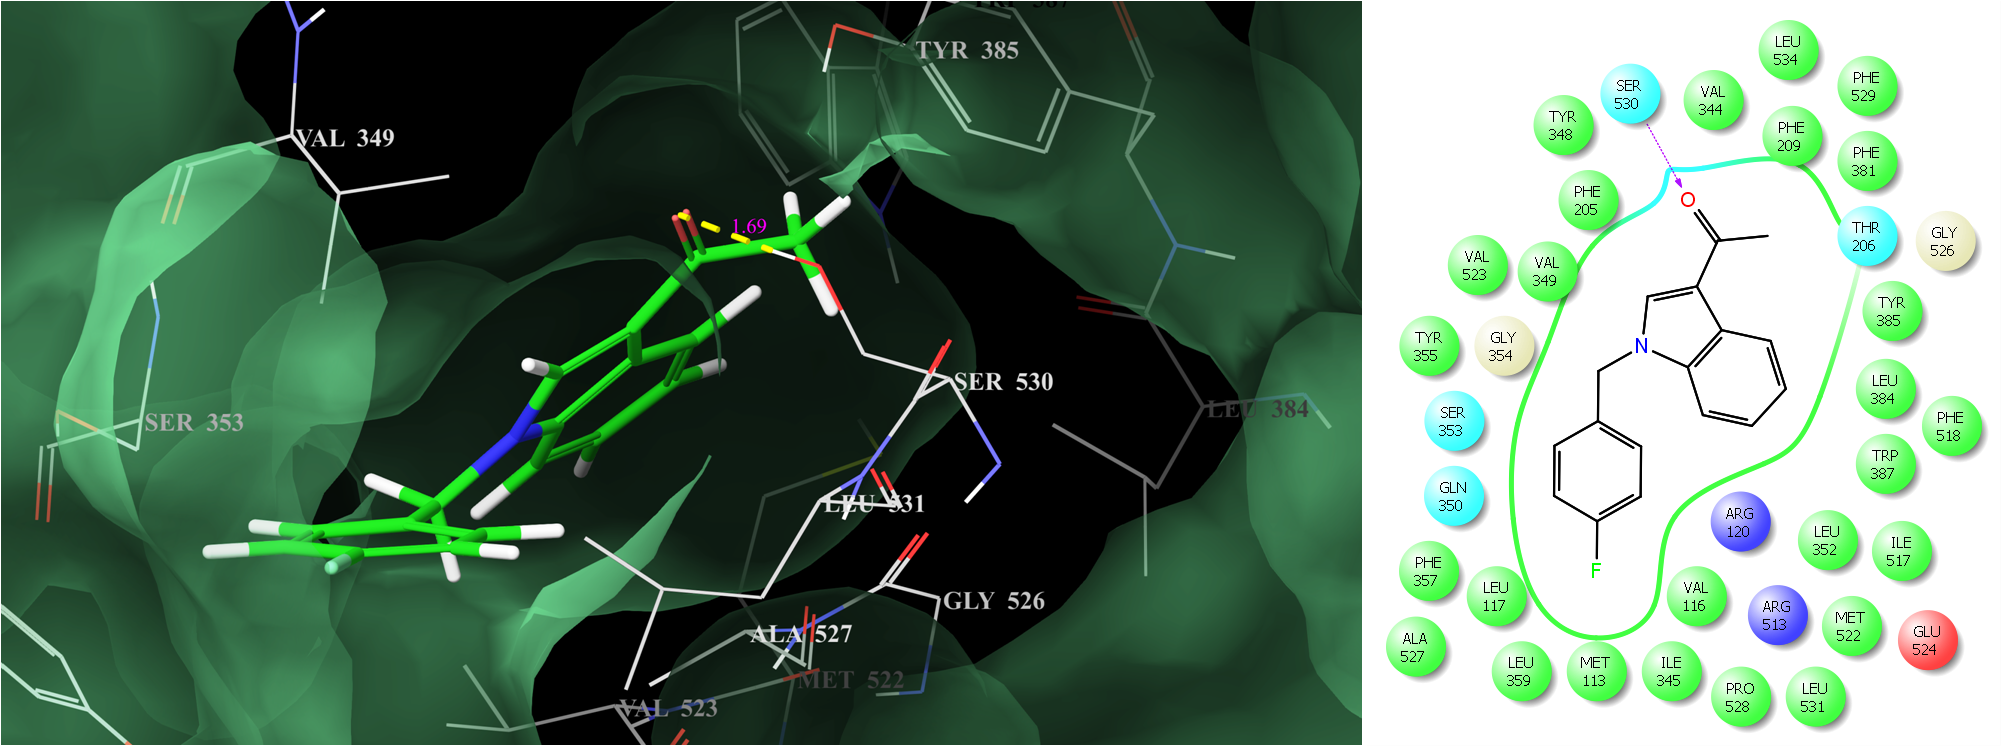


**Figure 4S.** Binding mode of **4e** into the active site cyclo-oxygenase-2 ( hydrogen bonding interaction is represented by pink dotted arrow)

**
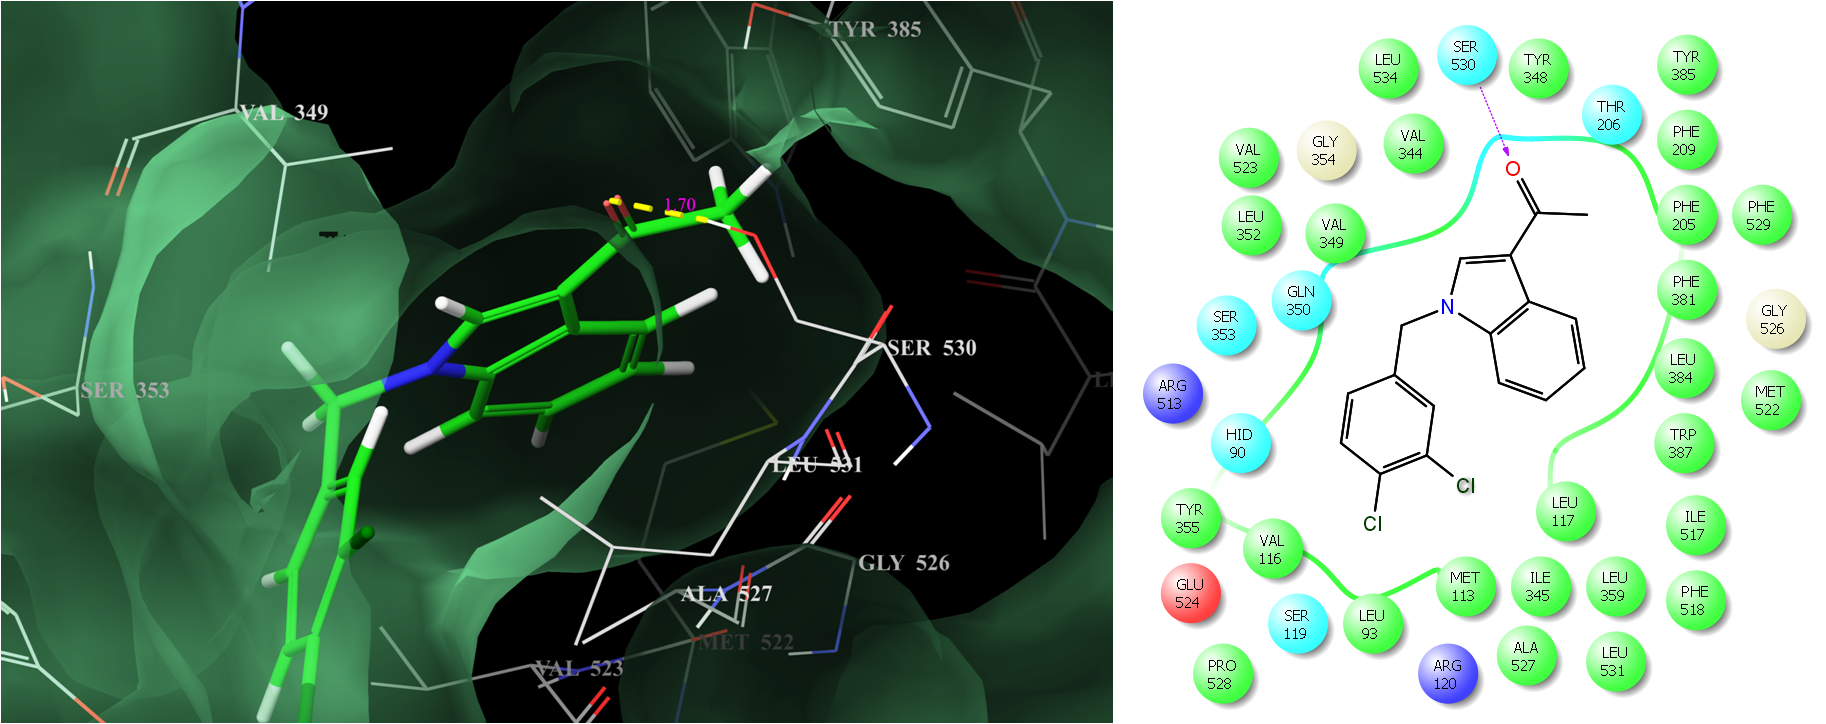
**

**Figure 5S.** Binding mode of **4f** into the active site cyclo-oxygenase-2 ( hydrogen bonding interaction is represented by pink dotted arrow)

**
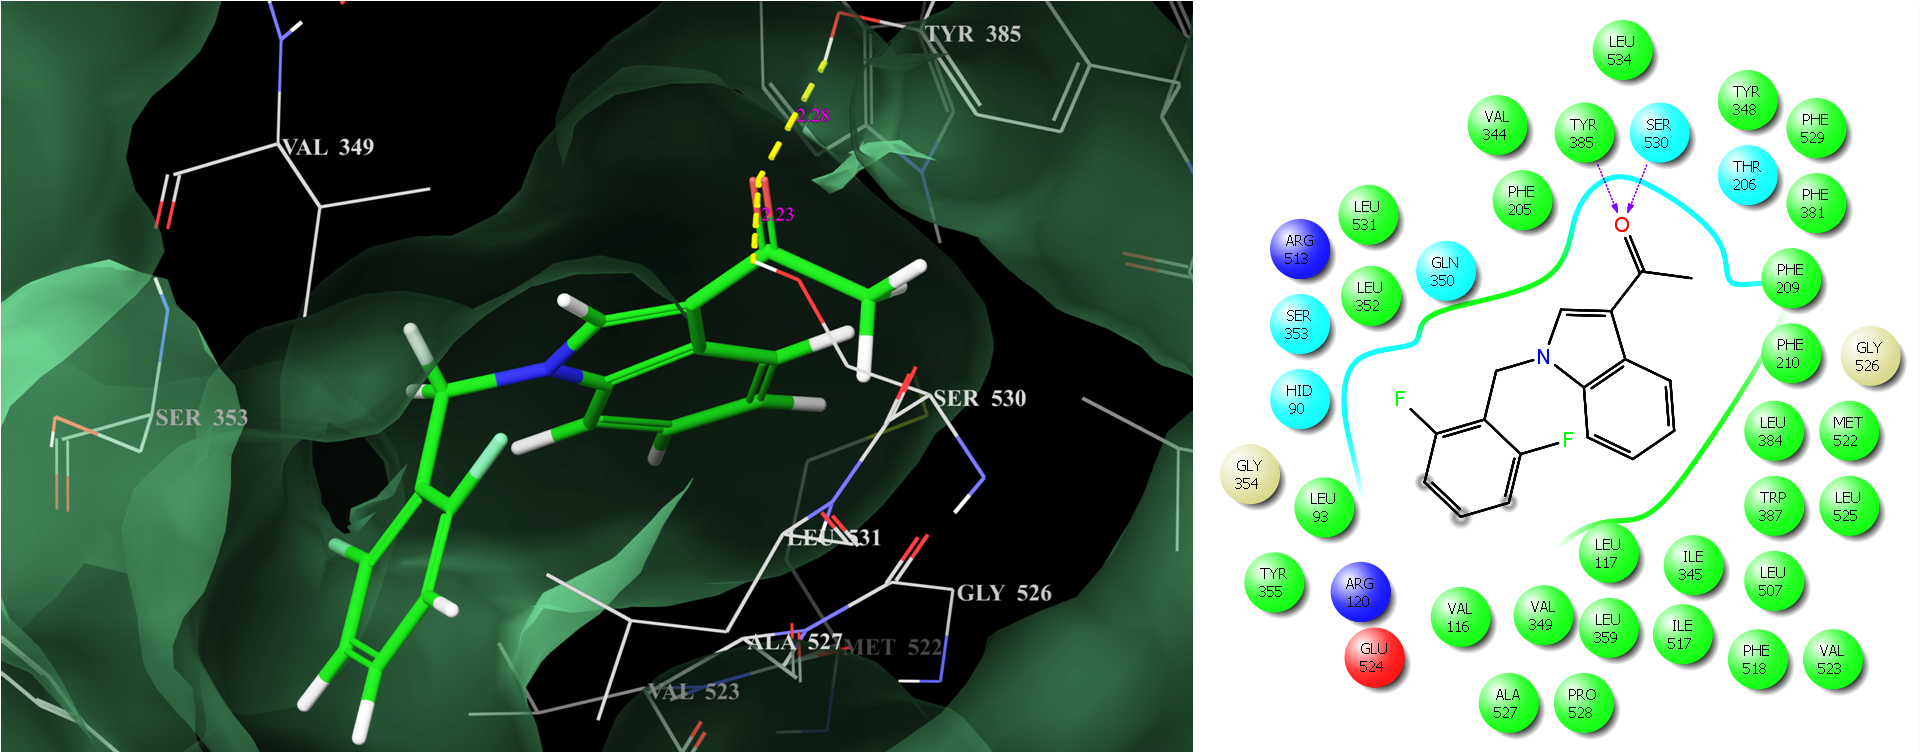
**

**Figure 6S.** Binding mode of **4g** into the active site cyclo-oxygenase-2 ( hydrogen bonding interaction is represented by pink dotted arrow)

**
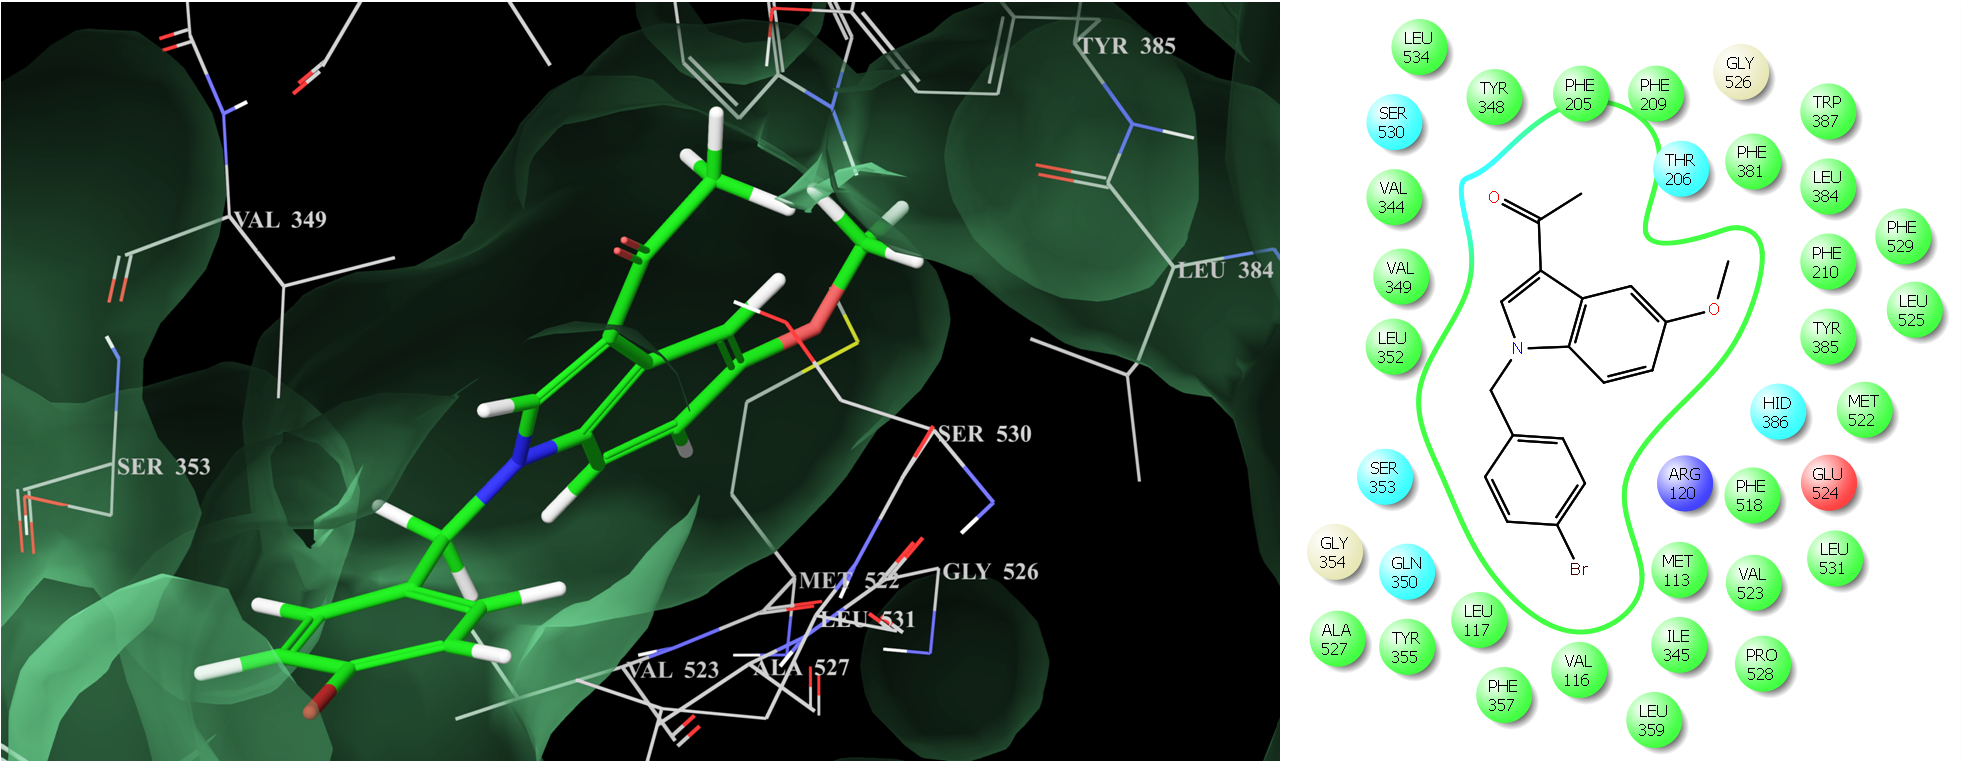
**

**Figure 7S.** Binding mode of **4h** into the active site cyclo-oxygenase-2 ( hydrogen bonding interaction is represented by pink dotted arrow)

**
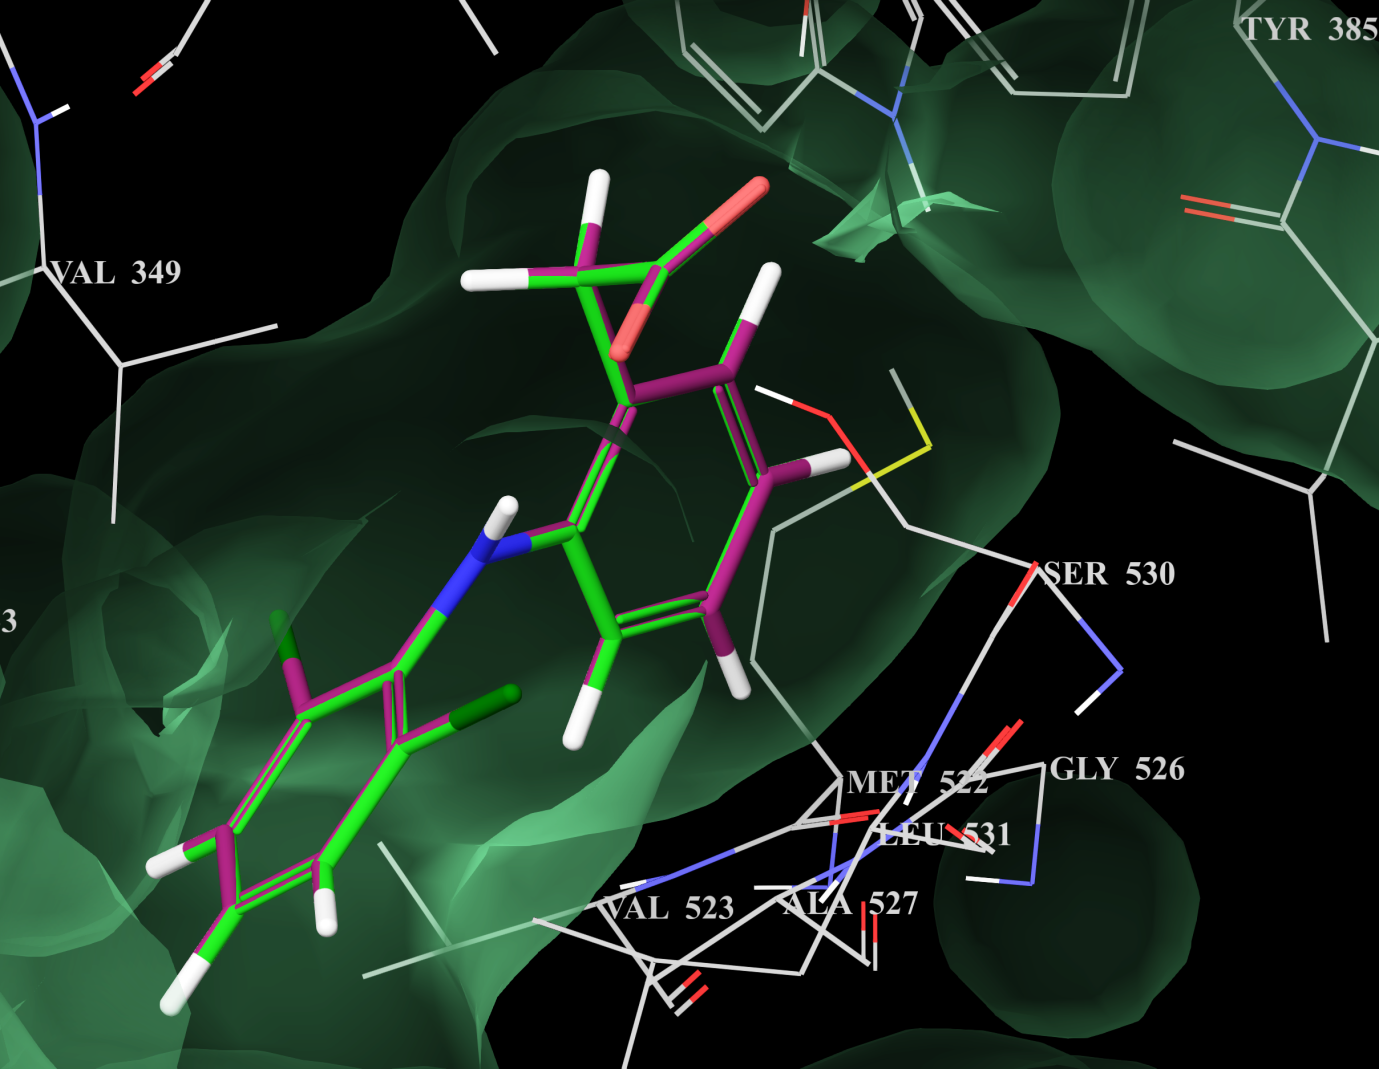
**

**Figure 8S.** Validation of the Molecular Docking protocol: Overlay of crystal structure binding mode of Diclofenac (maroon backbone) over the docked conformation (green backbone).

**References**

[24] Madadi, N. R.; Penthala, N. R.; Janganati, V.; Crooks, P. A. Synthesis and anti-Proliferative Activity of Aromatic Substituted 5-((1-Benzyl-1H-Indol-3-yl)Methylene)-1,3-Dimethylpyrimidine-2,4,6(1H,3H,5H)-Trione Analogs against Human Tumor Cell Lines. *Bioorg. Med. Chem. Lett*. **2014**, *24*, 601–603. DOI: 10.1016/j.bmcl.2013.12.013.

[25] Reddy, Y. T.; Reddy, P. N.; Koduru, S.; Damodaram, C.; Crooks, P. A. Aplysinopsin Analogs: Synthesis and anti-Proliferative Activity of Substituted (Z)-5-(N-Benzylindol-3-Ylmethylene)Imidazolidine-2,4-Diones. *Bioorg. Med. Chem*. **2010**, *18*, 3570–3574. DOI: 10.1016/j.bmc.2010.03.054.

[26] Friesner, R. A.; Banks, J. L.; Murphy, R. B.; Halgren, T. A.; Klicic, J. J.; Mainz, D. T.; Repasky, M. P.; Knoll, E. H.; Shelley, M.; Perry, J. K.; et al. Glide: A New Approach for Rapid, Accurate Docking and Scoring. 1. Method and Assessment of Docking Accuracy. *J. Med. Chem*. **2004**, *47*, 1739–1749. DOI: 10.1021/jm0306430.

[27] Halgren, T. A.; Murphy, R. B.; Friesner, R. A.; Beard, H. S.; Frye, L. L.; Pollard, W. T.; Banks, J. L. Glide: A New Approach for Rapid, Accurate Docking and Scoring. 2. Enrichment Factors in Database Screening. *J. Med. Chem*. **2004**, *47*, 1750–1759. DOI: 10.1021/jm030644s.

[28] Eldridge, M. D.; Murray, C. W.; Auton, T. R.; Paolini, G. V.; Mee, R. P. Empirical Scoring Functions: I. The Development of a Fast Empirical Scoring Function to Estimate the Binding Affinity of Ligands in Receptor Complexes. *J. Comput. Aided Mol. Des*. **1997**, *11*, 425–445. DOI: 10.1023/a:1007996124545.
